# Supplementary material for: Silica mineralization on anisotropic gelatin-hydrogel scaffolds
Source: Royal Society of Chemistry journal article supplement (doi:10.1039/d1ce01539g), 2022-01-01
Supplement: d1ce01539g1.pdf [file d1ce01539g1.pdf]

Support information for:

## **Silica mineralization on anisotropic gelatin-hydrogel scaffolds**

Kazuma Otsuka and Kazuki Murai\*

*Department of Chemistry and Materials, Faculty of Textile Science and Technology, Shinshu University, 3-15-1 Tokida, Ueda, Nagano 386-8567, Japan.*

*\* Corresponding author: [murai\\_kazuki@shinshu-u.ac.jp](mailto:murai_kazuki@shinshu-u.ac.jp) (Dr. K. Murai)*

### **Contents**

1. **Figure S1.** EDX mapping of the hybrid gels prepared at each system.
2. **Figure S2.** Relationship between the normalized absorbances of the Si-O-Si band and the Amide I band in hybrid gel systems with glass, polypropylene (PP), and polyvinyl chloride (PVC) substrates.
3. **Figure S3.** Changing appearance of gelatin hydrogels with glass, polypropylene (PP), and polyvinyl chloride (PVC) substrates during silica mineralization.
4. **Figure S4.** Time dependence of surficial-property changes in pristine hydrogels and hybrid gels with glass, polypropylene (PP), and polyvinyl chloride (PVC) substrates.
5. **Figure S5.** ATR-FTIR spectral analysis of the (a) pristine hydrogel systems and (b) hybrid gel systems.
6. **Figure S6.** Changes in storage elastic modulus  $G'$  and loss elastic modulus  $G''$  with temperature for (a) pristine hydrogels and (b) hybrid gels with glass, polypropylene (PP), and polyvinyl chloride (PVC) substrates.

### Hybrid gel (Glass system)

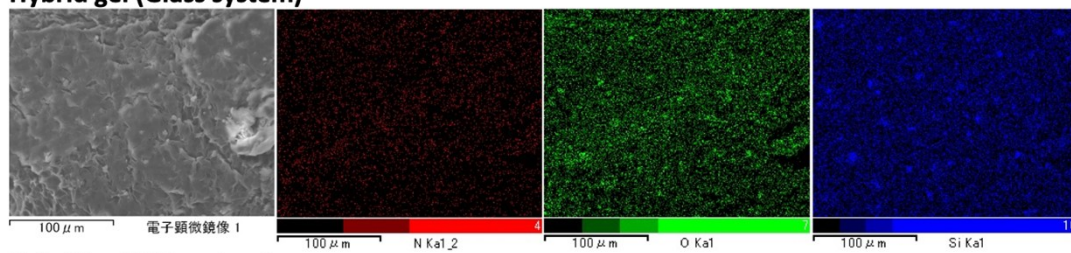

### Hybrid gel (PP system)

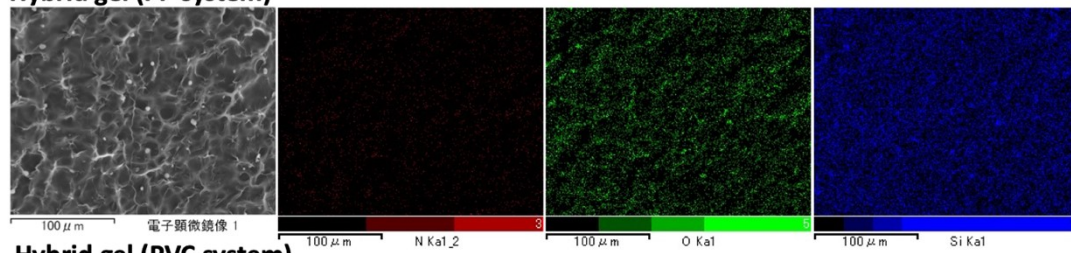

### Hybrid gel (PVC system)

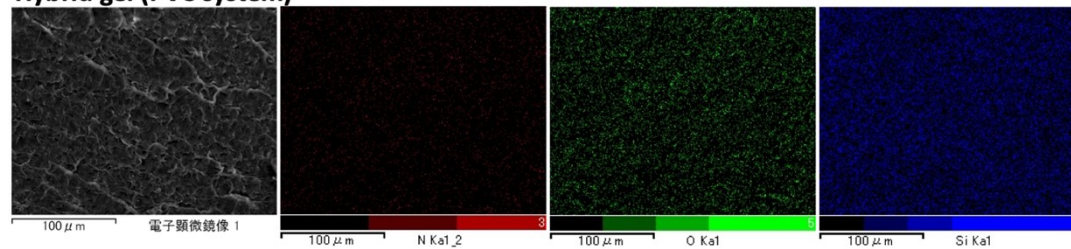

**Figure S1.** EDX mapping of the hybrid gels prepared at each system.

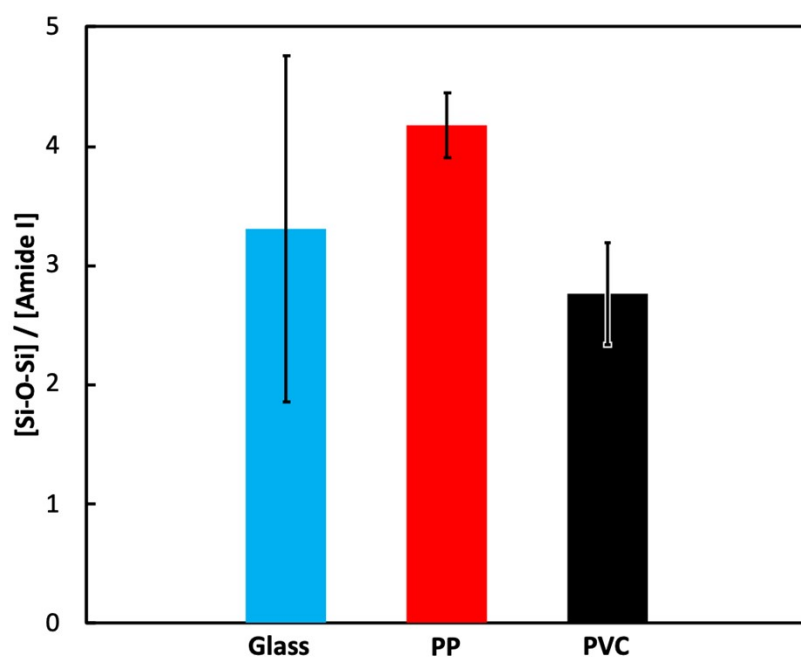

**Figure S2.** Relationship between the normalized absorbances of the Si-O-Si band and the Amide I band in hybrid gel systems with glass, polypropylene (PP), and polyvinyl chloride (PVC) substrates.

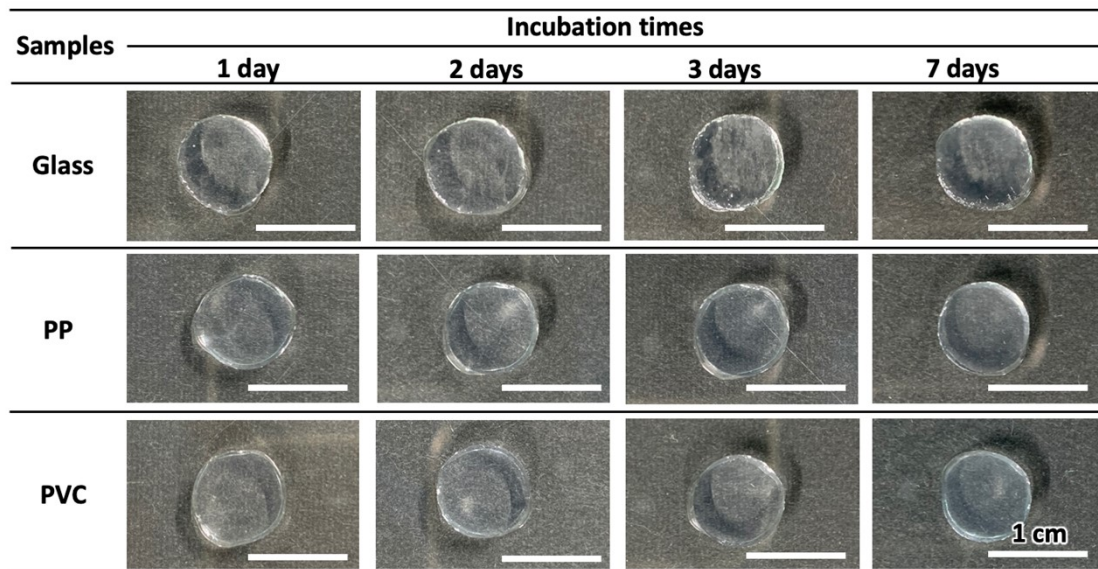

**Figure S3.** Changing appearance of gelatin hydrogels with glass, polypropylene (PP), and polyvinyl chloride (PVC) substrates during silica mineralization.

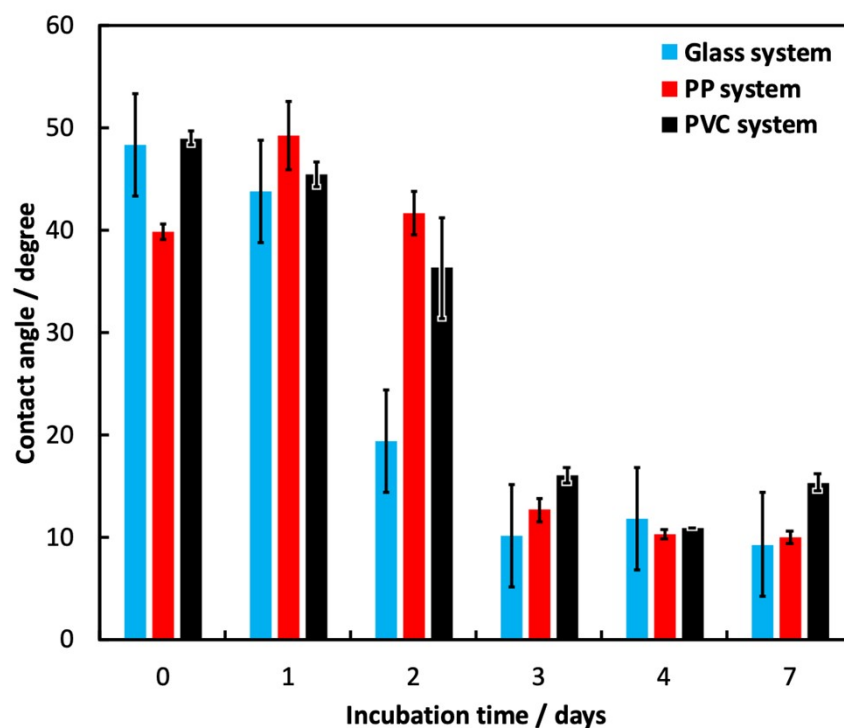

**Figure S4.** Time dependence of surficial-property changes in pristine hydrogels and hybrid gels with glass, polypropylene (PP), and polyvinyl chloride (PVC) substrates.

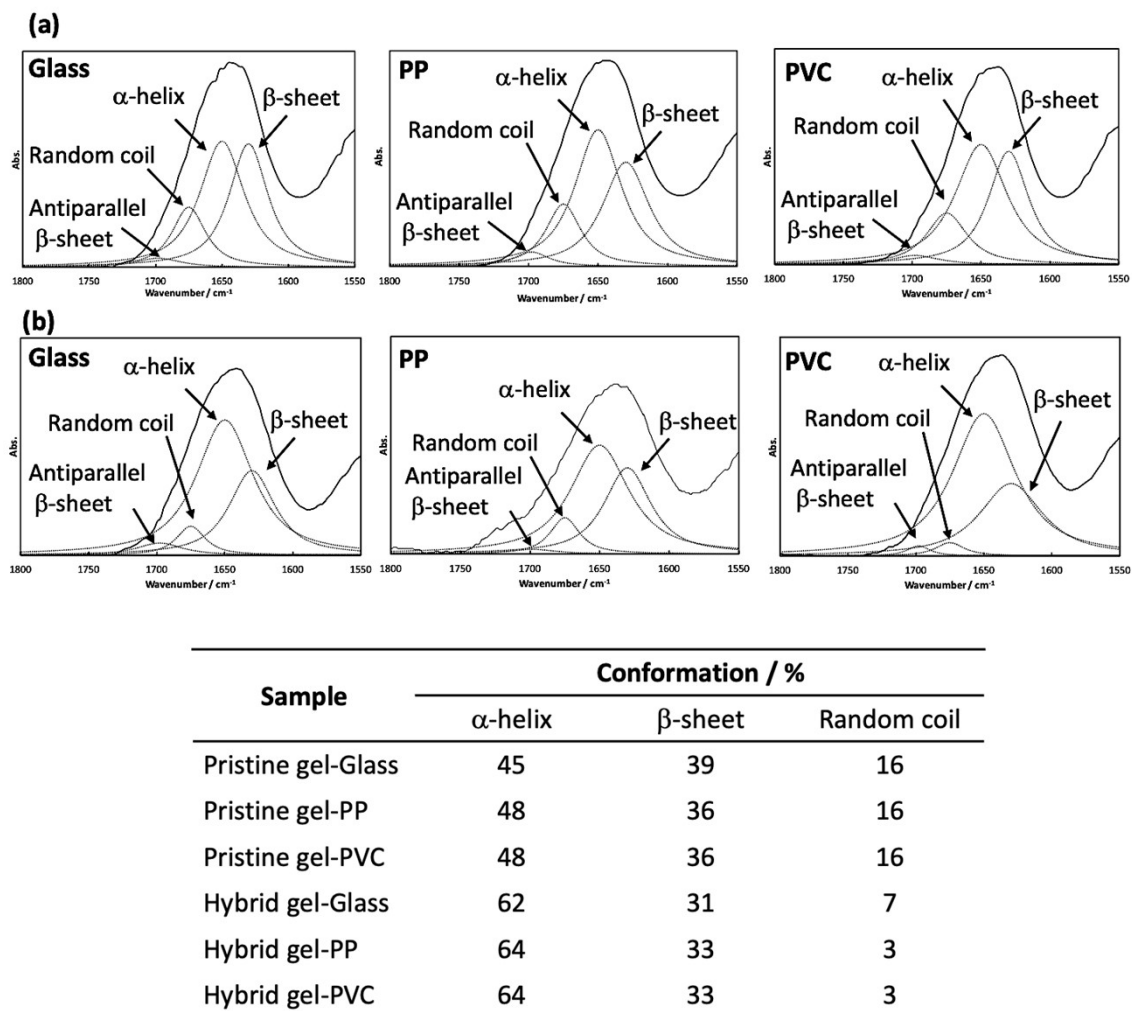

**Figure S5.** ATR-FTIR spectral analysis of the (a) pristine hydrogel systems and (b) hybrid gel systems. Dotted lines show the peak deconvolution of the amide I band from antiparallel  $\beta$ -sheet,  $\beta$ -sheet,  $\alpha$ -helix, and random coil conformations.

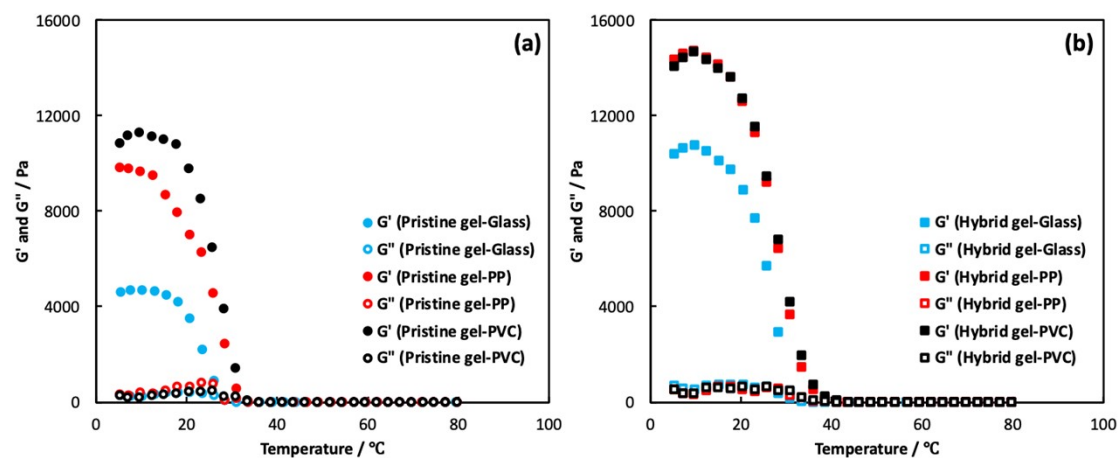

**Figure S6.** Changes in storage elastic modulus  $G'$  and loss elastic modulus  $G''$  with temperature for (a) pristine hydrogels and (b) hybrid gels with glass, polypropylene (PP), and polyvinyl chloride (PVC) substrates.
